# Supplementary material for: Fork pausing complex engages topoisomerases at the replisome
Source: PubMed Central journal article supplement — Genes Dev. 2020 Jan 1;34(1-2):87–98. doi: 10.1101/gad.331868.119 (PMC6938670; doi:10.1101/gad.331868.119), 2020-01-01
Supplement: supp_gad.331868.119_Supplemental_Fig_S1.pdf [file supp_gad.331868.119_Supplemental_Fig_S1.pdf]

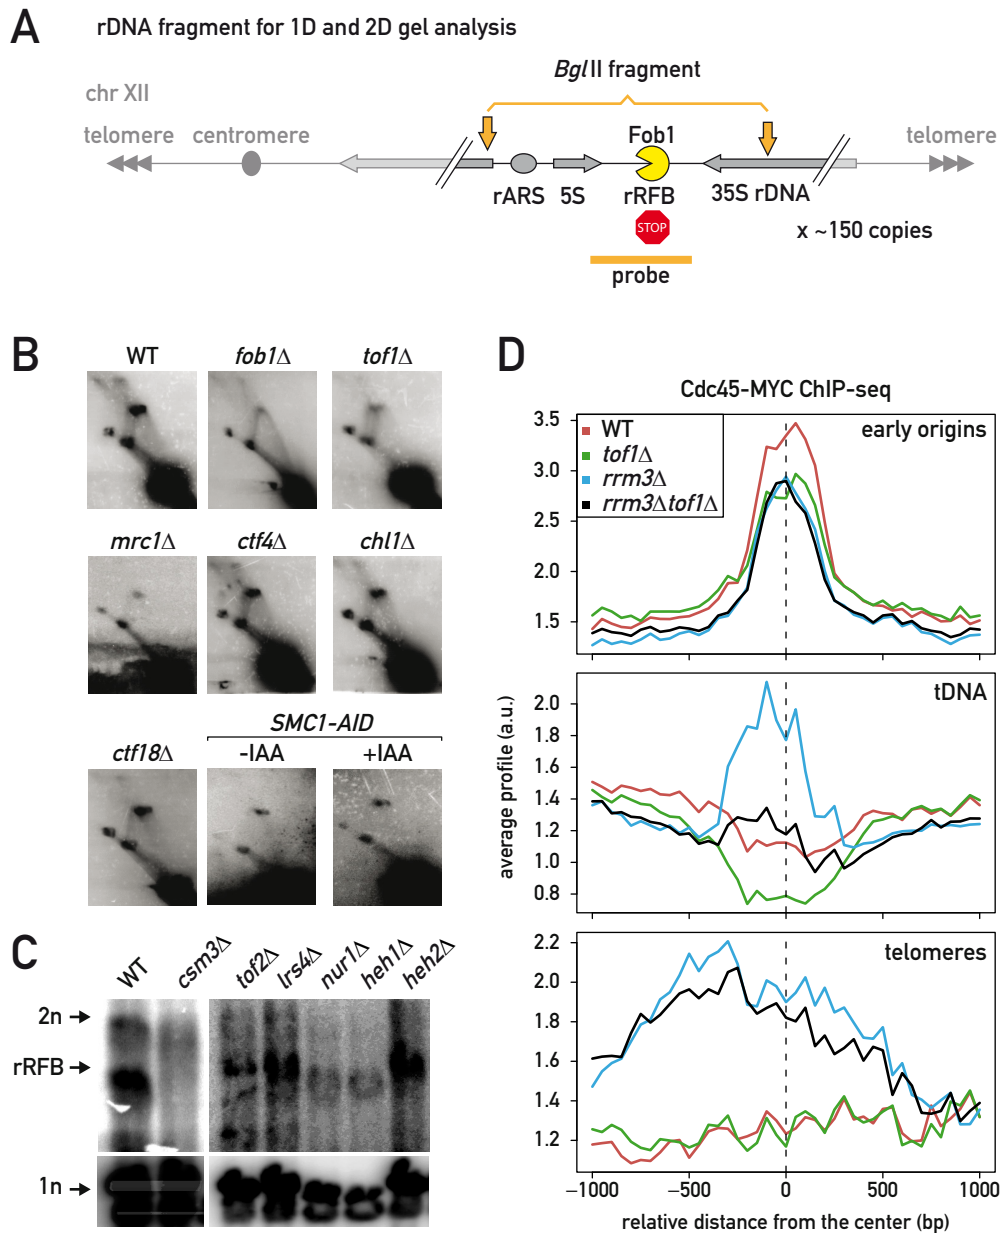

**Figure S1.** Related to Figure 1. *Tof1*-*Csm3* complex functions independently of cohesion, peripheral anchoring and *Rrm3* helicase (A) Diagram of the rDNA locus with the analyzed *Bgl*II fragment and location of the probe (rRFB) used for Southern blot hybridization of the 1D and 2D gels. (B) 2D gels for the estimation of fork pausing at rRFB in deletion mutants of the Replisome Progression Complex and sister chromatid cohesion establishment factors (*TOF1*, *MRC1*, *CTF4*, *CHL1*, and *CTF18*) and upon cohesin degradation with auxin (*SMC1-AID*). See Figure 1B for the diagram explaining DNA species on 2D gels. (C) 1D gels for the estimation of fork pausing at rRFB in deletion mutants of factors mediating peripheral anchoring of rDNA repeats to the nuclear envelope (cohibin and CLIP complexes). (D) Cdc45-MYC ChIP-seq in asynchronously growing cultures. Aggregation plots of the anti-MYC ChIP signal in Cdc45-MYC vs anti-MYC ChIP signal in WT not tagged control centered on early origins, tRNA genes and telomeres are shown.
