# Supplementary material for: Fork pausing complex engages topoisomerases at the replisome
Source: PubMed Central journal article supplement — Genes Dev. 2020 Jan 1;34(1-2):87–98. doi: 10.1101/gad.331868.119 (PMC6938670; doi:10.1101/gad.331868.119), 2020-01-01
Supplement: supp_gad.331868.119_Supplemental_Fig_S3.pdf [file supp_gad.331868.119_Supplemental_Fig_S3.pdf]

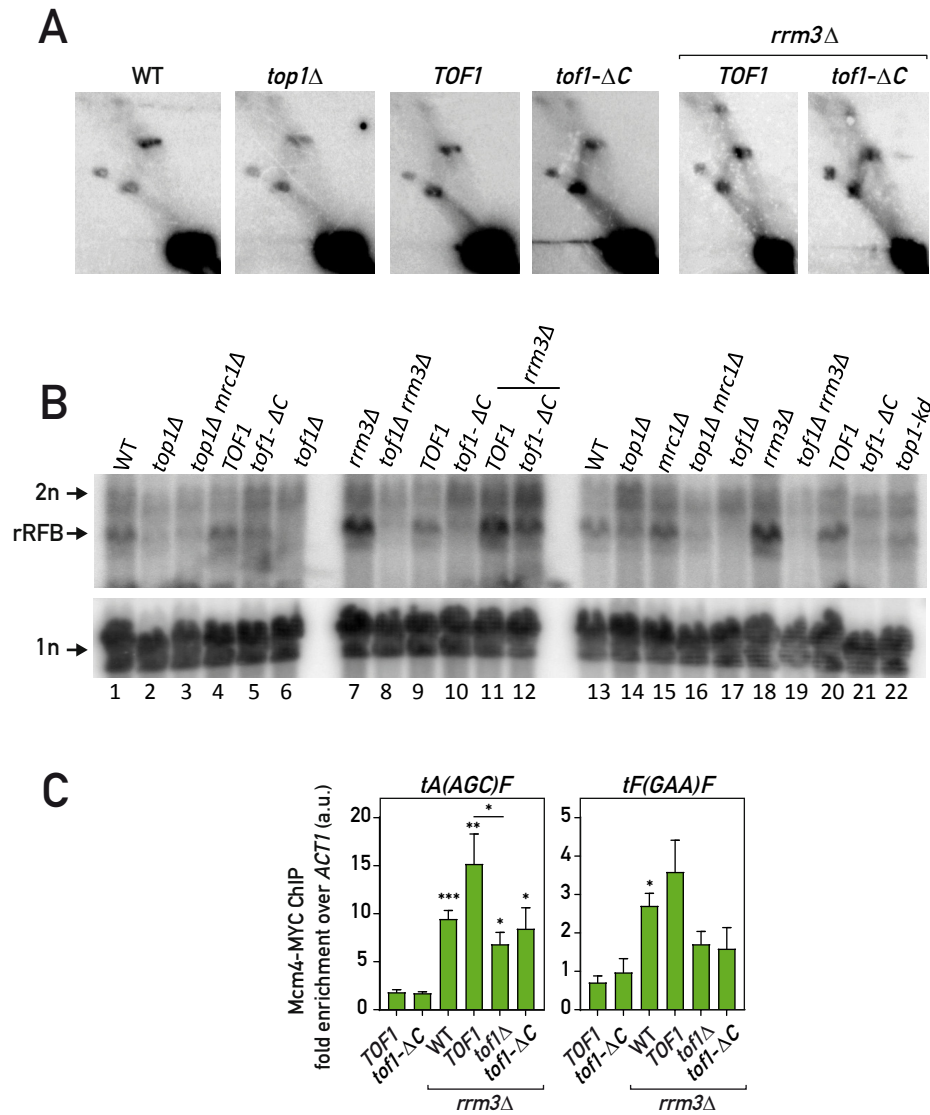

**Figure S3.** Related to Figure 3. Top1-C with Top1 promote fork pausing (A-B) 2D gels (A) and 1D gels (B) of the *Bgl* II digested DNA isolated from asynchronous cell cultures and probed with rDNA rRFB probe. (C) Mcm4-MYC ChIP-qPCR in the asynchronous cultures of the strains of indicated genotypes for two tRNA genes. *top1-kd* – catalytically dead Top1 (*top1-Y727F*). Values plotted and statistics as in Figure 1.
