# Supplementary material for: Fork pausing complex engages topoisomerases at the replisome
Source: PubMed Central journal article supplement — Genes Dev. 2020 Jan 1;34(1-2):87–98. doi: 10.1101/gad.331868.119 (PMC6938670; doi:10.1101/gad.331868.119), 2020-01-01
Supplement: supp_gad.331868.119_Supplemental_Fig_S5.pdf [file supp_gad.331868.119_Supplemental_Fig_S5.pdf]

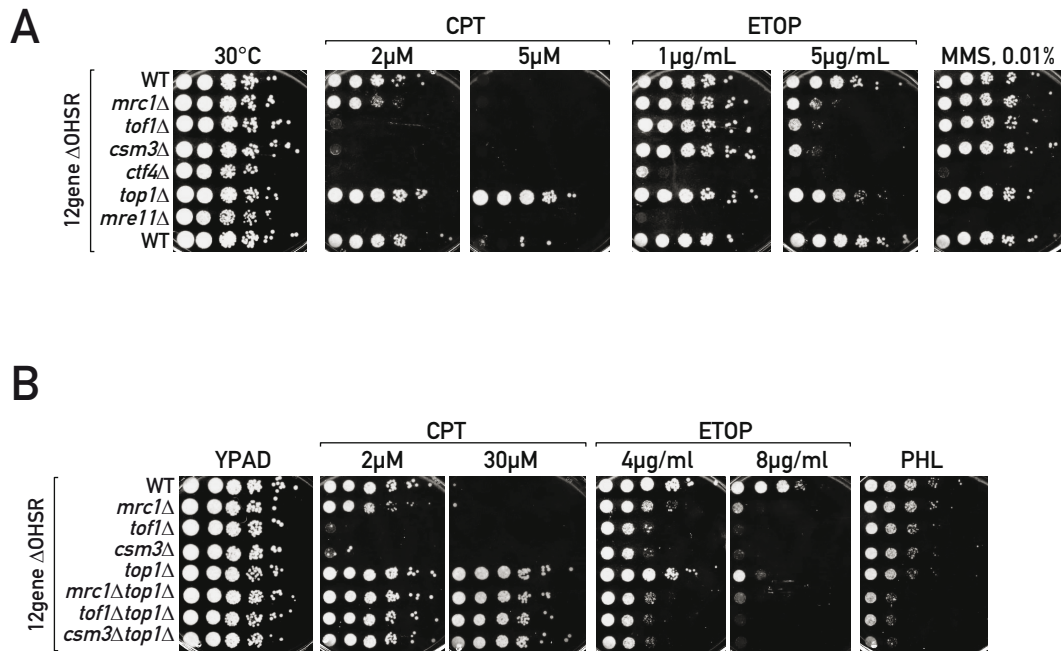

**Figure S5.** Related to Figure 5. Fork pausing complex protects cells from topoisomerase-blocking agents (A-B) Serial dilution growth assays: in mutants of replication fork progression complex (A) and in combinations of *MTC* genes deletion mutants and *top1* $\Delta$ . Genotoxic agents: CPT – camptothecin; ETOP – etoposide, MMS – methyl methanesulfonate (alkylating agent), PHL – phleomycin (used at 20  $\mu$ g/mL; DSB-inducing agent).
