# Supplementary material for: Fork pausing complex engages topoisomerases at the replisome
Source: PubMed Central journal article supplement — Genes Dev. 2020 Jan 1;34(1-2):87–98. doi: 10.1101/gad.331868.119 (PMC6938670; doi:10.1101/gad.331868.119), 2020-01-01
Supplement: supp_gad.331868.119_Supplemental_Table_S1.pdf [file supp_gad.331868.119_Supplemental_Table_S1.pdf]

**Table S1. Yeast strains used in this study**

| Strain        | Genotype                                                                          | Figures             | Source                   |
|---------------|-----------------------------------------------------------------------------------|---------------------|--------------------------|
| YDS2          | <i>W303 (leu2-3,112 trp1-1 can1-100 ura3-1 ade2-1 his3-11,15) MATa WT</i>         | 4A, 4B, 3C          | Lab collection           |
| OTA017        | <i>12geneΔ0HSR (multidrug-sensitive yeast background) MATa</i>                    |                     | (Chinen et al., 2011)    |
| YMS1294 (5-1) | <i>W303 MATa RAD5+ bar1Δ MCM4-13MYC::HIS3MX6 rrm3Δ::HPHMX4</i>                    | 1B, 1D, 3A 3B, S3C  | This study               |
| YMS1299-13    | <i>W303 MATa RAD5+ bar1Δ MCM4-13MYC::HIS3MX6 rrm3Δ::HPHMX4 tof1Δ::LEU2</i>        | 1B, 1D, 3A, 3B, S3C | This study               |
| BY4741        | <i>BY (MATa his3Δ1 leu2Δ0 met15Δ0 ura3Δ0) MATa WT</i>                             | 1C, S1B, S1C        | Lab collection           |
| YMS1610       | <i>BY MATa csm3Δ::KANMX</i>                                                       | 1C, S1C             | This study               |
| YMS1266-I     | <i>W303 MATa RDN1::ADE2::URA3::TRP1 tof1Δ::HPHMX4</i>                             | 1C, 1E, S1B, S2A    | This study               |
| YMS909        | <i>W303 MATa RDN1::ADE2 rrm3Δ::KANMX6</i>                                         | 1C, 1E              | (Shyian et al., 2016)    |
| YMS1282-1     | <i>W303 MATa RDN1::ADE2 rrm3Δ::KANMX6 tof1Δ::HIS3MX6</i>                          | 1C                  | This study               |
| YSM266-4      | <i>W303 MATa RAD5+ bar1Δ MCM4-13MYC::HIS3MX6</i>                                  | 1D                  | (Matarocci et al., 2014) |
| YMS1289-7     | <i>W303 MATa RAD5+ bar1Δ MCM4-13MYC::HIS3MX6 tof1Δ::LEU2</i>                      | 1D                  | This study               |
| YMS907        | <i>W303 MATa RDN1::ADE2</i>                                                       | 1E                  | (Shyian et al., 2016)    |
| YMS908        | <i>W303 MATa RDN1::ADE2 rif1Δ::NATMX4</i>                                         | 1E                  | (Shyian et al., 2016)    |
| YMS910        | <i>W303 MATa RDN1::ADE2 rif1Δ::NATMX4 rrm3Δ::KANMX6</i>                           | 1E                  | (Shyian et al., 2016)    |
| YMS1228       | <i>W303 MATa RDN1::ADE2 rif1Δ::NATMX4 tof1Δ::HPHMX4</i>                           | 1E                  | This study               |
| YMS1224       | <i>W303 MATa RDN1::ADE2 rrm3Δ::KANMX6 tof1Δ::HPHMX4</i>                           | 1E                  | This study               |
| YMS1226       | <i>W303 MATa RDN1::ADE2 rrm3Δ::KANMX6 rif1Δ::NATMX4 tof1Δ::HPHMX4</i>             | 1E                  | This study               |
| YMS912        | <i>W303 MATa RDN1::ADE2 rif1Δ::NATMX4 rrm3Δ::KANMX6 fob1Δ::URA3</i>               | 1E                  | (Shyian et al., 2016)    |
| YMS1227       | <i>W303 MATa RDN1::ADE2 rrm3Δ::KANMX6 rif1Δ::NATMX4 tof1Δ::HPHMX4 fob1Δ::URA3</i> | 1E                  | This study               |
| YMS1605-2     | <i>W303 MATalpha RDN1::ADE2</i>                                                   | 2A                  | This study               |
| YMS1606-2     | <i>W303 MATalpha RDN1::ADE2 tof1Δ::HPHMX4</i>                                     | 2A                  | This study               |
| YMS1607-2     | <i>W303 MATalpha RDN1::ADE2 top1Δ::NATMX4</i>                                     | 2A                  | This study               |
| YMS1608-2     | <i>W303 MATalpha RDN1::ADE2 top1Δ::NATMX4 tof1Δ::HPHMX4</i>                       | 2A                  | This study               |
| YMS1505       | <i>W303 MATa TOP1-13MYC::KANMX3</i>                                               | 2B, S2B, S2C        | This study               |
| YMS1506       | <i>W303 MATa TOP1-13MYC::KANMX3 Tof1-TAP::HIS3</i>                                | 2B, S2B             | This study               |
| YMS1507       | <i>W303 MATa TOP1-13MYC::KANMX3 Tof1-TAP::HIS3 mrc1Δ::HPHMX4</i>                  | 2B, S2B             | This study               |
| YMS1508       | <i>W303 MATa TOP1-13MYC::KANMX3 Tof1-TAP::HIS3 csm3Δ::HPHMX4</i>                  | 2B                  | This study               |
| YMS1512       | <i>W303 MATa TOP1-13MYC::KANMX3 Mrc1-TAP::HIS3</i>                                | 2B, S2B             | This study               |
| YMS1513       | <i>W303 MATa TOP1-13MYC::KANMX3 Mrc1-TAP::HIS3 tof1Δ::HPHMX4</i>                  | 2B, S2B             | This study               |
| YMS1510       | <i>W303 MATa TOP1-13MYC::KANMX3 Csm3-TAP::HIS3</i>                                | 2B, 5A, S2C         | This study               |
| YMS1511       | <i>W303 MATa TOP1-13MYC::KANMX3 Csm3-TAP::HIS3 tof1Δ::HPHMX4</i>                  | 2B, 5A              | This study               |
| YMS1539-5     | <i>W303 MATa RAD5+ bar1Δ Mcm4-3FLAG::KANMX TOP1-13MYC::HIS3MX4</i>                | 2C, 2D, S2D, S2E    | This study               |
| YMS1540-9     | <i>W303 MATa RAD5+ bar1Δ Mcm4-3FLAG::KANMX TOP1-</i>                              | 2C, 2D,             | This study               |

|            |                                                                                                          |                      |                       |
|------------|----------------------------------------------------------------------------------------------------------|----------------------|-----------------------|
|            | <i>13MYC::HIS3MX4 tof1Δ::LEU2</i>                                                                        | S2D, S2E             |                       |
| YMS1555-1  | <i>W303 MATa RAD5+ bar1Δ Mcm4-3FLAG::KANMX TOP1-13MYC::HIS3MX4 mrc1Δ::LEU2</i>                           | 2C, 2D, S2D          | This study            |
| YMS1542-19 | <i>W303 MATa RAD5+ bar1Δ Mcm4-3FLAG::KANMX TOP1-13MYC::HIS3MX4 tof1Δ::LEU2 rrm3Δ::HPHMX4</i>             | 2C, 2D, S2D          | This study            |
| YMS1538    | <i>W303 MATa RAD5+ bar1Δ TOP1-13MYC::HIS3MX4</i>                                                         | 2E                   | This study            |
| YMS1551-5  | <i>W303 MATa RAD5+ bar1Δ TOP1-13MYC::HIS3MX4 TOF1-3FLAG::KANMX</i>                                       | 2E, 2F, S2F, S2G     | This study            |
| YMS1552-6  | <i>W303 MATa RAD5+ bar1Δ TOP1-13MYC::HIS3MX4 tof1-Δ981-1238-3FLAG::KANMX</i>                             | 2E, 2F, S2F, S2G     | This study            |
| YMS1449    | <i>12geneΔ0HSR MATa</i>                                                                                  | 3A, S3A              | This study            |
| YMS1638-5  | <i>12geneΔ0HSR MATa TOF1-3FLAG::KANMX</i>                                                                | 3A, S3A              | This study            |
| YMS1561-1  | <i>12geneΔ0HSR MATa tof1Δ::LEU2</i>                                                                      | 3A, 5B, 5D, 5E, S5B  | This study            |
| YMS1639-4  | <i>12geneΔ0HSR MATa tof1-Δ981-1238-3FLAG::KANMX</i>                                                      | 3A, S3A              | This study            |
| YMS1563-1  | <i>12geneΔ0HSR MATa top1Δ::KANMX6</i>                                                                    | 3A, S3A, S5B         | This study            |
| YMS1646-8  | <i>W303 MATa RAD5+ bar1Δ MCM4-13MYC::HIS3MX6 rrm3Δ::HPHMX4 TOF1-3FLAG::KANMX</i>                         | 3A, 3B, S3A, 3B, S3C | This study            |
| YMS1647-12 | <i>W303 MATa RAD5+ bar1Δ MCM4-13MYC::HIS3MX6 rrm3Δ::HPHMX4 tof1-Δ981-1238-3FLAG::KANMX</i>               | 3A, 3B, S3A, S3C     | This study            |
| YMS1644-1  | <i>W303 MATa RAD5+ bar1Δ MCM4-13MYC::HIS3MX6 TOF1-3FLAG::KANMX</i>                                       | 3B, S3C              | This study            |
| YMS1645-4  | <i>W303 MATa RAD5+ bar1Δ MCM4-13MYC::HIS3MX6 tof1-Δ981-1238-3FLAG::KANMX</i>                             | 3B, S3C              | This study            |
| YMS1676-13 | <i>W303 MATa RAD5+ bar1Δ MCM4-13MYC::HIS3MX6 rrm3Δ::HPHMX4 TOF1-3FLAG::KANMX top1Δ::NATMX4</i>           | 3B, S3C              | This study            |
| YMS1677-15 | <i>W303 MATa RAD5+ bar1Δ MCM4-13MYC::HIS3MX6 rrm3Δ::HPHMX4 tof1-Δ981-1238-3FLAG::KANMX top1Δ::NATMX4</i> | 3B, S3C              | This study            |
| YMS1673-7  | <i>W303 MATa RAD5+ bar1Δ MCM4-13MYC::HIS3MX6 rrm3Δ::HPHMX4 tof1Δ::LEU2 top1Δ::NATMX4</i>                 | 3B, S3C              | This study            |
| YMS1457    | <i>W303 MATalpha top2-ts</i>                                                                             | 4A, 4B               | This study            |
| YMS1465    | <i>W303 MATa top1Δ::NATMX4 top2-ts</i>                                                                   | 4A, 4B               | This study            |
| YMS1637-1  | <i>W303 MATalpha top2-ts tof1-Δ981-1238-3FLAG::KANMX</i>                                                 | 4A, 4B               | This study            |
| YMS1692    | <i>W303 MATa top2-ts top1Δ::NATMX4 bar1Δ::LEU2</i>                                                       | 4C                   | This study            |
| YMS1689    | <i>W303 MATa top2-ts tof1-Δ981-1238-3FLAG::KANMX rif1::NATMX4 RDN1::ADE2 bar1Δ::LEU2</i>                 | 4C                   | This study            |
| YMS1640-7  | <i>W303 MATalpha TOP2-AID*-9myc::hphB URA3::TIR1 Csm3-TAP::HIS3 TOF1-3FLAG::KANMX</i>                    | 5A, S4G              | This study            |
| YMS1641-8  | <i>W303 MATalpha TOP2-AID*-9myc::hphB URA3::TIR1 Csm3-TAP::HIS3 tof1-Δ981-1238-3FLAG::KANMX</i>          | 5A, S4G              | This study            |
| YMS1559-1  | <i>12geneΔ0HSR MATa WT</i>                                                                               | 5B, 5D, 5E, S5B      | This study            |
| YMS1707-1  | <i>12geneΔ0HSR MATa TOF1-3FLAG::KANMX</i>                                                                | 5B, 5E               | This study            |
| YMS1708-1  | <i>12geneΔ0HSR MATa tof1-Δ981-1238-3FLAG::KANMX</i>                                                      | 5B, 5D, 5E           | This study            |
| YMS1712    | <i>W303 MATa rad9Δ::SpHIS5</i>                                                                           | 5B, 5C               | This study            |
| YMS1713    | <i>W303 MATa rad9Δ::SpHIS5 TOF1-3FLAG::KANMX</i>                                                         | 5B, 5C               | This study            |
| YMS1714    | <i>W303 MATa rad9Δ::SpHIS5 tof1-Δ981-1238-3FLAG::KANMX</i>                                               | 5B, 5C               | This study            |
| YMS1715    | <i>W303 MATa rad9Δ::SpHIS5 tof1Δ::KANMX4</i>                                                             | 5B, 5C               | This study            |
| YMS419-4   | <i>W303 MATa RAD5+ bar1Δ SLD3-13MYC::HIS3MX6</i>                                                         | 5C                   | (Shyian et al., 2016) |
| YMS493     | <i>W303 MATa RAD5+ bar1Δ SLD3-13MYC::HIS3MX6 sml1Δ::HPHMX4 mec1Δ::KANMX6</i>                             | 5C                   | (Shyian et al., 2016) |
| YMS1560-1  | <i>12geneΔ0HSR MATa mrc1Δ::LEU2</i>                                                                      | 5D, 5E, S5B          | This study            |
| YMS1709-1  | <i>12geneΔ0HSR MATa mrc1Δ::LEU2 TOF1-3FLAG::KANMX</i>                                                    | 5E                   | This study            |
| YMS1710-1  | <i>12geneΔ0HSR MATa mrc1Δ::LEU2 tof1-Δ981-1238-3FLAG::KANMX</i>                                          | 5D, 5E               | This study            |

|               |                                                                                |          |                       |
|---------------|--------------------------------------------------------------------------------|----------|-----------------------|
| YMS1711-1     | <i>12geneΔOHSR MATa mrc1Δ::LEU2 tof1Δ::LEU2</i>                                | 5D, 5E   | This study            |
| YMS1024-1     | <i>W303 MATa URA3::BrdU-Inc fob1Δ::KANMX6</i>                                  | S1B      | (Shyian et al., 2016) |
| YMS1609       | <i>BY MATa tof1Δ::KANMX</i>                                                    | S1B      | This study            |
| YMS598-2      | <i>W303 MAT alpha mrc1Δ::HPHMX4</i>                                            | S1B      | This study            |
| YMS1611       | <i>BY MATa ctf4Δ::KANMX</i>                                                    | S1B      | This study            |
| YMS1612       | <i>BY MATa chl1Δ::KANMX</i>                                                    | S1B      | This study            |
| YMS1613       | <i>BY MATa ctf18Δ::KANMX</i>                                                   | S1B      | This study            |
| YMS1403-14    | <i>W303 MATa OsTIR1::URA3 SMC1-AID*-9myc::hphB</i>                             | S1B      | This study            |
| YMS1614       | <i>BY MATa tof2Δ::KANMX</i>                                                    | S1C      | This study            |
| YMS1615       | <i>BY MATa lrs4Δ::KANMX</i>                                                    | S1C      | This study            |
| YMS1616       | <i>BY MATa nur1Δ::KANMX</i>                                                    | S1C      | This study            |
| YMS1617       | <i>BY MATa heh1Δ::KANMX</i>                                                    | S1C      | This study            |
| YMS1618       | <i>BY MATa heh2Δ::KANMX</i>                                                    | S1C      | This study            |
| YMS461-2      | <i>W303 MATa RAD5+ bar1Δ CDC45-13MYC::HIS3MX6</i>                              | S1D      | This study            |
| YMS1288-3     | <i>W303 MATa RAD5+ bar1Δ CDC45-13MYC::HIS3MX6 tof1Δ::LEU2</i>                  | S1D      | This study            |
| YMS1293 (4-1) | <i>W303 MATa RAD5+ bar1Δ CDC45-13MYC::HIS3MX6 rrm3Δ::HPHMX4</i>                | S1D      | This study            |
| YMS1298-7     | <i>W303 MATa RAD5+ bar1Δ CDC45-13MYC::HIS3MX6 rrm3Δ::HPHMX4 tof1Δ::LEU2</i>    | S1D      | This study            |
| YMS1264-E     | <i>W303 MATa RDN1::ADE2::URA3::TRP1 WT</i>                                     | S2A      | This study            |
| YMS465-1      | <i>W303 MATa mre11Δ::HPHMX4</i>                                                | 3C       | (Shyian et al., 2016) |
| YMS467-1      | <i>W303 MATa mre11Δ::HPHMX4 rif1Δ::NATMX4</i>                                  | 3C       | (Shyian et al., 2016) |
| YMS1703       | <i>W303 MATalpha mre11Δ::HPHMX4 rif1Δ::NATMX4 tof1-Δ981-1238-3FLAG::KANMX</i>  | 3C       | This study            |
| YMS1704       | <i>W303 MATalpha mre11Δ::HPHMX4 rif1Δ::NATMX4 tof1::KANMX6</i>                 | 3C       | This study            |
| YMS1481       | <i>W303 MATalpha Top1-MYC::KANMX3</i>                                          | S4A      | This study            |
| YMS1482-3     | <i>W303 MATalpha Top1-MYC::KANMX3 TOF1-TAP::HIS3</i>                           | S4A      | This study            |
| YMS1483-8     | <i>W303 MATalpha Top1-MYC::KANMX3 CSM3-TAP::HIS3</i>                           | S4A      | This study            |
| YMS1485       | <i>W303 MATalpha TOP2-3FLAG::KANMX</i>                                         | S4A      | This study            |
| YMS1486-5     | <i>W303 MATalpha TOP2-3FLAG::KANMX TOF1-TAP::HIS3</i>                          | S4A      | This study            |
| YMS1487-9     | <i>W303 MATalpha TOP2-3FLAG::KANMX CSM3-TAP::HIS3</i>                          | S4A      | This study            |
| YMS1496.      | <i>W303 MATa RAD5+ bar1Δ TOP2-AID*-9myc::hphB</i>                              | S4B      | This study            |
| YMS1553-9     | <i>W303 MATa RAD5+ bar1Δ TOP2-AID*-9myc::hphB TOF1-3FLAG::KANMX</i>            | S4B      | This study            |
| YMS1554-9     | <i>W303 MATa RAD5+ bar1Δ TOP2-AID*-9myc::hphB tof1-Δ981-1238-3FLAG::KANMX</i>  | S4B      | This study            |
| YDS3          | <i>W303 MATalpha WT</i>                                                        | S4C      | Lab collection        |
| YMS1405       | <i>W303 MATalpha OsTIR1::URA3 tof1Δ::LEU2</i>                                  | S4C      | This study            |
| BEN3          | <i>W303 MATa top1Δ::NATMX4</i>                                                 | S4C      | This study            |
| BEN16         | <i>W303 MATa top2-ts</i>                                                       | S4C      | This study            |
| BEN10         | <i>W303 MATa top2-ts top1Δ::NATMX4</i>                                         | S4C      | This study            |
| BEN240        | <i>MATa OsTIR1::URA3 HIS3+ ADE2+ TOP1-AID*-9myc::hphB</i>                      | S4D, S4F | This study            |
| BEN237        | <i>MATa OsTIR1::URA3 HIS3+ ADE2+ TOP2-AID*-9myc::hphB</i>                      | S4D      | This study            |
| BEN250        | <i>MATa OsTIR1::URA3 HIS3+ ADE2+ TOP3-AID*-9myc::hphB</i>                      | S4D      | This study            |
| BEN242        | <i>MATa OsTIR1::URA3 HIS3+ ADE2+ TOP2-AID*-9myc::hphB TOPI-aid(kanMX)</i>      | S4D      | This study            |
| YMS1470       | <i>MATa OsTIR1::URA3 HIS3+ ADE2+ TOP2-AID*-9myc::hphB TOP3-AID*-9myc::hphB</i> | S4D      | This study            |
| YMS1477       | <i>MATa OsTIR1::URA3 HIS3+ ADE2+ TOP3-AID*-9myc::hphB TOPI-aid(kanMX)</i>      | S4D      | This study            |
| YMS1687       | <i>W303 MATa top2-ts bar1Δ::LEU2</i>                                           | S4E      | This study            |
| YMS1691       | <i>W303 MATa top2-ts bar1Δ::LEU2 tof1Δ::HPHMX4</i>                             | S4E      | This study            |
| YMS1459       | <i>MATalpha OsTIR1::URA3 TOPI-aid(kanMX) TOP2-AID*-9myc::hphB</i>              | S4F      | This study            |

|            |                                                                                                                 |     |            |
|------------|-----------------------------------------------------------------------------------------------------------------|-----|------------|
| YMS1402-40 | <i>W303 MATa OsTIR1::URA3 TOF1-AID*-9myc::hphB</i>                                                              | S4F | This study |
| YMS1635    | <i>W303 MATalpha TOP2-AID*-9myc::hphB OsTIR1::URA3 Csm3-TAP::HIS3 top1Δ::NATMX4</i>                             | S4G | This study |
| YMS1643-11 | <i>W303 MATalpha TOP2-AID*-9myc::hphB OsTIR1::URA3 Csm3-TAP::HIS3 tof1-Δ981-1238-3FLAG::KANMX top1Δ::NATMX4</i> | S4G | This study |
| BEN151     | <i>W303 MATa tor1-1 fpr1Δ::NAT RPL13A-2XFKB12::TRP1 top1Δ::HISMx6 TOP2-FRB::KANMX6</i>                          | S4H | This study |
| YMS1460    | <i>MATa OsTIR1::URA3 TOP1-aid(kanMX) TOP2-AID*-9myc::hphB</i>                                                   | S4H | This study |
| YMS1467    | <i>W303 MATalpha OsTIR1::URA3 TOP1-aid(kanMX) TOP2-AID*-9myc::hphB rad53-K227A::KAN</i>                         | S4H | This study |
| YMS1468    | <i>MATa OsTIR1::URA3 TOP1-aid(kanMX) TOP2-AID*-9myc::hphB rad9Δ::SpHIS5</i>                                     | S4H | This study |
| YMS1559-2  | <i>I2geneΔ0HSR MATalpha WT</i>                                                                                  | S5A | This study |
| YMS1560-2  | <i>I2geneΔ0HSR MATalpha mrc1Δ::LEU2</i>                                                                         | S5A | This study |
| YMS1561-2  | <i>I2geneΔ0HSR MATalpha tof1Δ::LEU2</i>                                                                         | S5A | This study |
| YMS1562-2  | <i>I2geneΔ0HSR MATalpha csm3Δ::LEU2</i>                                                                         | S5A | This study |
| YMS1563-2  | <i>I2geneΔ0HSR MATalpha top1Δ::KANMX6</i>                                                                       | S5A | This study |
| YMS1562-1  | <i>I2geneΔ0HSR MATa csm3Δ::LEU2</i>                                                                             | S5B | This study |
| YMS1564-1  | <i>I2geneΔ0HSR MATa top1Δ::KANMX6 mrc1Δ::LEU2</i>                                                               | S5B | This study |
| YMS1565-1  | <i>I2geneΔ0HSR MATa top1Δ::KANMX6 tof1Δ::LEU2</i>                                                               | S5B | This study |
| YMS1566-1  | <i>I2geneΔ0HSR MATa top1Δ::KANMX6 csm3Δ::LEU2</i>                                                               | S5B | This study |
